# Supplementary material for: A RanBP2-type zinc finger protein functions in intron splicing in Arabidopsis mitochondria and is involved in the biogenesis of respiratory complex I
Source: PubMed Central journal article supplement (PMC8034646; doi:10.1093/nar/gkab066), 2021-02-28
Supplement: gkab066_supplemental_file.pdf [file gkab066_supplemental_file.pdf]

| Name             | sequence                             | purpose                                                                      |
|------------------|--------------------------------------|------------------------------------------------------------------------------|
| SALK_043472C-LP  | AGATGTGCCCTAGCTTCTGCTG               |                                                                              |
| SALK_043472C-RP  | AGCTTAGGGCTTTGAAATTCG                | genotyping oz2 segregating progeny                                           |
| LBb1.3           | ATTTTGCCGATTTCGGAAC                  |                                                                              |
| CS84933-LP       | ATTCTCCTGGAAGGAGCTGTC                |                                                                              |
| CS84933-RP       | ACTCCCTCTTGAATCCTGG                  | genotyping oz2 segregating progeny                                           |
| p745             | AACGTCCGCAATGTGTTATTAAGTTGTC         |                                                                              |
| ABI3-F2          | CTCAAAACGTAAACACACGTCATT             |                                                                              |
| ABI3-F3          | AATCCGTGTCTGCCTCTTCC                 | sequencing the ABI3 promoter                                                 |
| ABI3-F4          | CTCTCCTTTTCTCTCTGCTGAG               |                                                                              |
| ABI3-F5          | GCTTTGGATCCTCCTTCGTC                 |                                                                              |
| OZ2-F1           | ATGGCTGCTTCAATCTCTCTTCTCTC           |                                                                              |
| OZ2-R1           | CTATCTCTCGATAACTCTTCGACTGTTTCTG      | cloning of OZ2 CDS                                                           |
| OZ2-F2           | CAGATTGATTCTGGTGAGTTGAGTA            |                                                                              |
| OZ2-F3           | GTCTCCTGAAGAAAAAGTCTGTAA             | sequencing the OZ2 CDS                                                       |
| OZ2-F4           | ATTCAGTAAAAAAGAAATGAAAACT            |                                                                              |
| OZ2-F5           | TCGATTCTGATATGGAGGATGATAG            |                                                                              |
| AtOZ2_ZnFing_For | CTGTGAATCCCAGTTATCAAAGAGCGCCC        |                                                                              |
| AtOZ2_ZnFing_Rev | CTGTAAGCTTTTACCTGTCTGTTTGTGCTTCAGTG  | expression of the recombinant protein used in zinc binding analysis          |
| OZ2-nostop-R1    | TCTCTCGATAACTCTTCGACTGTTTCTG         | OZ2 localization and BiFC                                                    |
| qRTnad2-ex2-F    | ATTGAGCCTCAAAGTTTATGTTTTATGT         | quantitative RT-PCR for nad2-ex2ex3 (spliced): qRTnad2-ex2F+qRTnad2-ex3R     |
| qRTnad2-ex3R     | ATCGAGCACCAGTGATTCGTATCC             |                                                                              |
| qRTnad2-in2R     | GATATCGGTAGTTGTCCGGTCTGATCC          | quantitative RT-PCR for nad2-ex2in2 (unspliced): qRTnad2-ex2F + qRTnad2-in2R |
| qRT-AOX1b-F      | AGAAAAGTACGGAGGAGAAAGG               |                                                                              |
| qRT-AOX1b-R      | ATATGTCTCCCATGGCCTAAAG               | quantitative RT-PCR for AOX1b                                                |
| qRT-AOX2-F       | TATCGACAATGGGAGATCGAG                |                                                                              |
| qRT-AOX2-R       | CCGTTACAACATCTTTCAACGT               | quantitative RT-PCR for AOX2                                                 |
| PPE-nad2-ex3ex4  | /5HEX/CCCTCATAGATATCTGGTCCACATAT     | primer used in the PPE reaction to determine the splicing of nad2-intron3    |
| PPE-nad7-ex2ex3  | /5HEX/CGTGTCTTGGGCCATCAGAAACATAG     | primer used in the PPE reaction to determine the splicing of nad7-intron2    |
| OZ2-Y2H-F        | AGCAACTGAATCAACCCATGAA               |                                                                              |
| ABO5-Y2H-F       | GCCACAAAGTATGTCGCCAAAG               |                                                                              |
| ABO5-Y2H-R       | CTACAAGGGCTGACAACCCA                 |                                                                              |
| BIR6-Y2H-F       | TCTTCGAAACCAAGATTCTATGCTT            |                                                                              |
| BIR6-Y2H-R       | TCAAGCTGCAGCACCAAAG                  |                                                                              |
| MAT2-Y2H-F       | TGGCTAAAACCTTCTCTACATATACC           |                                                                              |
| MAT2-Y2H-R       | TTACATGCGTGCAATGCGAAGC               |                                                                              |
| mCSF1-Y2H-F      | GCCTCCGAAAATCCTGAC                   |                                                                              |
| mCSF1-Y2H-R      | CTAGGTTGTCTCGTCAGGAG                 |                                                                              |
| MISF26-Y2H-F     | GCATTGACGATTCATATCCTTGTCAAAGC        |                                                                              |
| MISF26-Y2H-R     | TCATCTGACTGAAATCATCTCATTATAAACTCTATC |                                                                              |
| MISF74-Y2H-F     | GAAGCTCGAAAACCGATTGTCTCG             |                                                                              |
| MISF74-Y2H-R     | CTATAAATGTCTCCTCTCTCTAGCA            |                                                                              |
| mTERF15-Y2H-F    | TCTCAGCAATCTCACACCTATCAA             |                                                                              |
| mTERF15-Y2H-R    | CTAAGCAAGTACTCTATAAAGGAC             |                                                                              |
| MTL1-Y2H-F       | TCTTTGCAAAGAATCTGCTACTACG            |                                                                              |
| MTL1-Y2H-R       | TCAAAAAGCTGCATTATAAACCTTCG           |                                                                              |
| OTP439-Y2H-F     | AATCTCAATGTGAATCATCTCCTC             |                                                                              |
| OTP439-Y2H-R     | CTATATGGTAAACTGATCATGGG              |                                                                              |
| PMH2-Y2H-F       | GCTGGATTGCGATCTCTG                   |                                                                              |
| PMH2-Y2H-R       | TCAGTAAGATCTTTCCCATCATTTG            |                                                                              |
| RUG3-Y2H-F       | ACAAGCCCAGACATCGACTCCG               |                                                                              |
| RUG3-Y2H-R       | TTAAGGTGATCTTGAGACTAAACACAGAGC       |                                                                              |
| SLO3-Y2H-F       | TCTTCATCTTATCATCTACATCGA             |                                                                              |
| SLO3-Y2H-R       | CTACATTAGCTGTATTTCCAGGAGGAG          |                                                                              |
| WTF9-Y2H-F       | CACTTCTTAAGGAAGTTTCTTCAATCTTTG       |                                                                              |
| WTF9-Y2H-R       | TTAGCCTTCAAATCCAAATCCAAATCTTTATC     |                                                                              |
| ABO5-BiFC-F      | ATGAAGCTTCTCCGCCGC                   |                                                                              |
| ABO5-BiFC-R      | CAAAGGGCTGACAACCCAC                  |                                                                              |
| BIR6-BiFC-F      | ATGTACAGATCAATGGCAATCCTG             |                                                                              |
| BIR6-BiFC-R      | AGCTGCAGCACCAAGAGTTC                 |                                                                              |
| MAT2-BiFC-F      | ATGCGTAGAAGCTTCTCTGTTTTGGG           |                                                                              |
| MAT2-BiFC-R      | CATGCGTGCAATGCGAAGC                  |                                                                              |
| mCSF1-BiFC-F     | ATGTTCTTGATTCGTCTCTCCCG              |                                                                              |
| mCSF1-BiFC-R     | GGTTGTCTCGTCAAGGAAATCTTG             |                                                                              |
| MISF26-BiFC-F    | ATGGCGTCAGCTTTGCG                    |                                                                              |
| MISF26-BiFC-R    | TCTGACTGAAATCATCTCATTATAAACTCTATCAGC |                                                                              |
| MISF74-BiFC-F    | ATGATTCCGCCGCCGATC                   |                                                                              |
| MISF74-BiFC-R    | TAAATGTCTCCTCTCTCTAGCATTTTTACG       |                                                                              |
| mTERF15-BiFC-F   | ATGGCCTCAAACCTCAAACCTTCA             |                                                                              |
| mTERF15-BiFC-R   | AGCAAGTGACTCTATAAAGGACTTCATGT        | primers used to amplify genes whose products were tested in BiFC             |
| MTL1-BiFC-F      | ATGGTTATGCTAGCGAGATCAAAGCTAG         |                                                                              |
| MTL1-BiFC-R      | AAAAGCTGCATTATAAACCTTCTGCTAT         |                                                                              |
| OTP439-BiFC-F    | ATGTACTTGAAAAGGATGTTCCG              |                                                                              |
| OTP439-BiFC-R    | TATGGTAAACTGATCATGGGCTCT             |                                                                              |
| PMH2-BiFC-F      | ATGATCACTACAGTGCTACGACGA             |                                                                              |
| PMH2-BiFC-R      | GTAAGATCTTTCCCATCATTTGA              |                                                                              |
| RUG3-BiFC-F      | ATGGCAGCGTTAAGCCACC                  |                                                                              |
| RUG3-BiFC-R      | AGGTGATCTTGAGACTAAACACAGAGC          |                                                                              |
| SLO3-BiFC-F      | ATGCTTCAGAAGATCTCCTCCGAT             |                                                                              |
| SLO3-BiFC-R      | CATTAGCTGTATTTCCAGGAGGAG             |                                                                              |
| WTF9-BiFC-F      | ATGCTCTTATTCGCCGCCA                  |                                                                              |
| WTF9-BiFC-R      | GCCTTCAAATCCAAATCCAAATCTTTATCTAC     |                                                                              |

Supplementary Table S1. List of primers used in this study

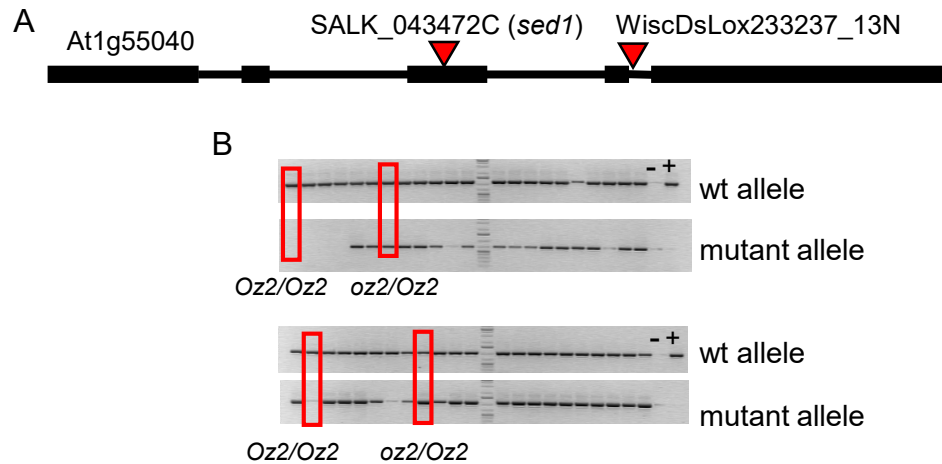

**Supplementary Figure S1. *oz2* mutation is embryonic lethal.** A. Gene model for OZ2 (At1g55040). Exon (introns) are represented by black squares (lines). Two insertional T-DNA mutant lines are available, and the location of the insertion is represented by a red triangle. B. Genotyping progeny of *oz2/OZ2* from two independent insertional mutations shows an absence of homozygous mutant plants *oz2/oz2*. Upper panel progeny from SALK\_043472C, lower panel progeny from WiscDsLox233237\_13N. Only homozygous wild-type (*Oz2/Oz2*) or heterozygous (*oz2/Oz2*) plants are present.

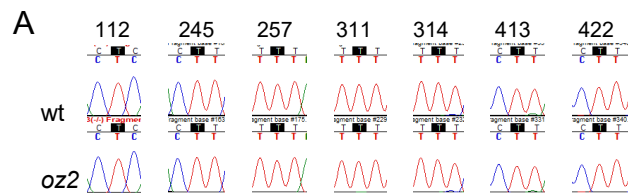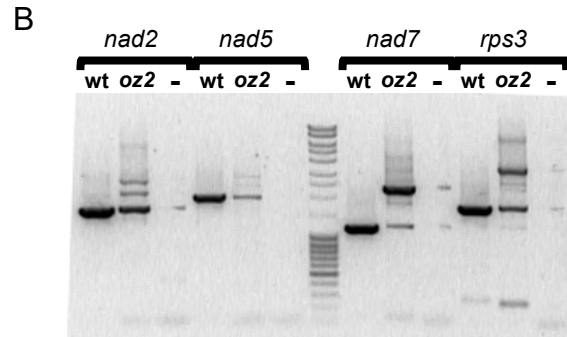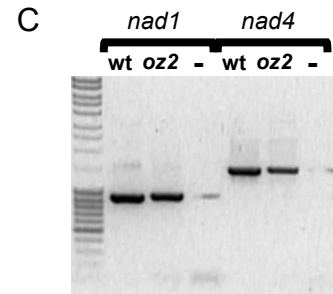

**Supplementary Figure S2. OZ2 is not an editing factor.** A. Example of the editing survey of *oz2* mutant performed by bulk sequencing of RT-PCR products. These electrophoretograms were obtained by sequencing the mitochondrial gene *cox3* from a wild-type (wt) plant and from an *oz2* homozygous mutant plant. Above each electrophoretogram is the position of the edited cytosine in the *cox3* transcript. Each cytosine is fully edited (only a T peak) in both wt and *oz2*. This survey was repeated for the whole set of mitochondrial genes known to harbor editing sites. Only spliced products containing only exons were analyzed. Intron sequences were not included in the analysis. B. RT-PCR products for *nad2*, *nad5*, *nad7* and *rps3* show a ladder pattern in the *oz2* mutant plant with a marked reduction of the mature product. C. RT-PCR products for *nad1* and *nad4* show a slight reduction of the mature product in the *oz2* mutant.

| Target       | P-Value ANOVA | P-Value BH | Ratio oz2/wt |
|--------------|---------------|------------|--------------|
| atp1         | 3.9E-03       | 2.4E-02    | 5.5E+00      |
| ccmFc-ex1ex2 | 5.7E-03       | 3.2E-02    | 9.5E+00      |
| ccmFn2       | 2.9E-03       | 2.2E-02    | 3.8E+00      |
| cox1         | 1.2E-02       | 4.8E-02    | 3.4E+00      |
| matR         | 2.7E-03       | 2.2E-02    | 3.3E+00      |
| nad1-ex2ex3  | 3.5E-03       | 2.4E-02    | 6.9E+00      |
| nad1-ex3ex4  | 6.6E-03       | 3.2E-02    | 4.8E+00      |
| nad1-ex4ex5  | 6.1E-03       | 3.2E-02    | 5.1E+00      |
| nad1-in1ex2  | 9.8E-03       | 4.1E-02    | 4.5E+00      |
| nad1-in4ex5  | 1.5E-03       | 1.6E-02    | 6.1E+00      |
| rps3-ex1in1  | 1.7E-03       | 1.6E-02    | 9.7E+00      |
| nad1-ex1ex2  | 9.4E-07       | 6.4E-05    | 1.7E-02      |
| nad2-ex3ex4  | 5.5E-04       | 9.3E-03    | 1.2E-03      |
| nad5-ex1ex2  | 6.8E-04       | 9.3E-03    | 4.3E-02      |
| nad5-ex2ex4  | 5.8E-04       | 9.3E-03    | 1.7E-02      |
| nad7-ex2ex3  | 6.4E-04       | 9.3E-03    | 1.1E-03      |
| rps3-ex      | 8.9E-03       | 4.0E-02    | 1.1E-01      |

**Supplementary Figure S3. Transcript species showing a significant difference between oz2 mutant plants and wild-type plants.** Figure S3 gives the results from the one-way analysis of variance (ANOVA) between the wild-type group (three plants) and the mutant oz2 plant group (three T1 and one T0). In red (blue) background the amount of the transcript species is significantly increased (decreased) in the oz2 mutant plant. The increase ranges from 3.3 (matR) to 9.7 (rps3 unspliced) while the decrease is much more pronounced and ranges from 0.11 (rps3 spliced) to 0.001 (nad7-ex2ex3). The decrease in transcript amount in the oz2 mutant affects only spliced species. Among 68 transcript species tested by qRT-PCR, 11 exhibit an increase in the oz2 mutant plant (red background), while 6 show a decrease (blue background). The P-Value ANOVA is not corrected for multiple testing, while the P-value after Benjamini-Hochberg (BH) is corrected for false discovery rate.

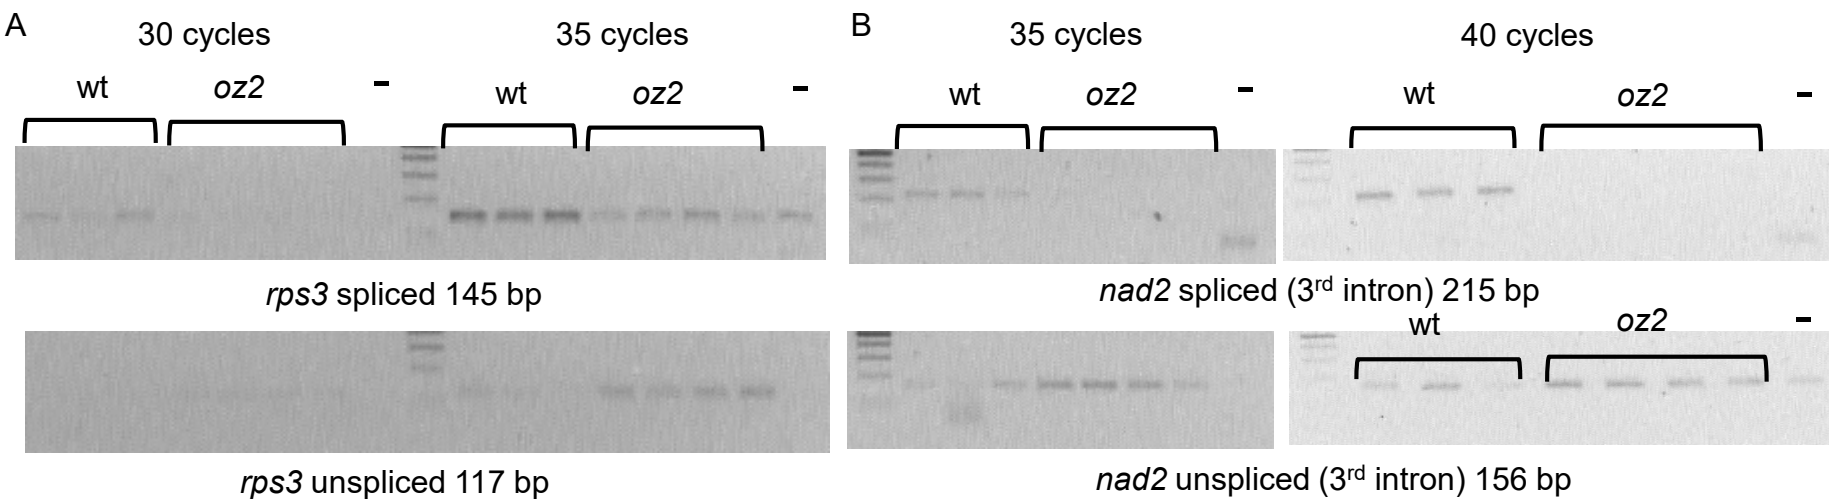

**Supplementary Figure S4. Semi-quantitative RT-PCR assay confirms that *oz2* mutation results in a splicing defect.**

The amount of template for each PCR reaction was the same (1 ng) and estimated after quantifying the RNA for each wild-type and *oz2* mutant plant by Qubit assay. A. *rps3* assay shows a detectable amount of spliced product in the wt at 30 cycles, while there is no detectable product in the *oz2* lanes. Conversely some unspliced product is detectable in the *oz2* lanes at 30 cycles while no product is apparent in the wt lanes. At 35 cycles, some spliced product is detectable in the *oz2* lanes while the amount of amplified spliced product is higher in the wt lanes (more intense bands). A similar observation can be made for the unspliced products which is now detectable in wt lanes, while more abundant in the *oz2* lanes. B. Semi-quantitative RT-PCR assay for the splicing of the *nad2* third intron. At 35 cycles, some spliced product is detectable in the wt lanes, but none in the *oz2* lanes. The unspliced product is detectable in all the lanes but is more abundant in the *oz2* lanes. At 40 cycles, the spliced product is readily visible in the wt lanes while still not detectable in the *oz2* lanes. As at 35 cycles, the amount of unspliced product is more abundant in the *oz2* lanes than in the wt lanes.

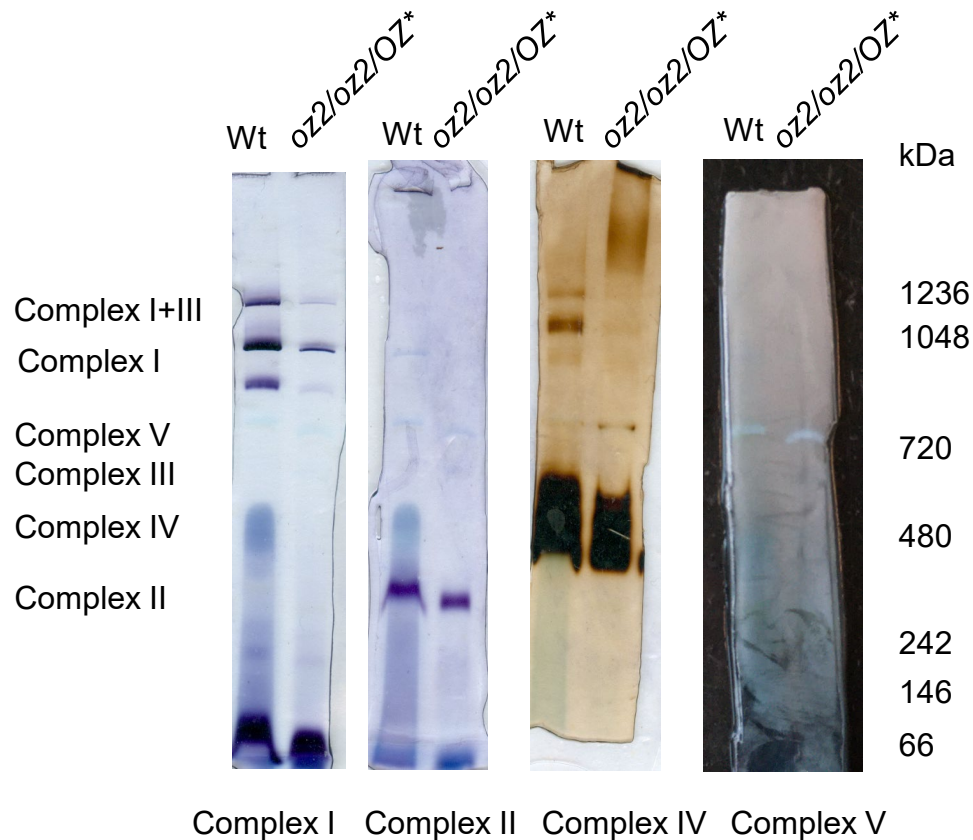

**Supplementary Figure S5. In-gel activity assays of mitochondrial enzymes in native gels demonstrate that only complex I is seriously impaired in the *oz2/oz2/OZ2\** mutant.** Arabidopsis mitochondrial proteins were solubilized by digitonin and subsequently separated by 1-D BN-PAGE. After electrophoresis, slices of the gel were stained with in gel activity assays for complex I, complex II, complex IV, or complex V.

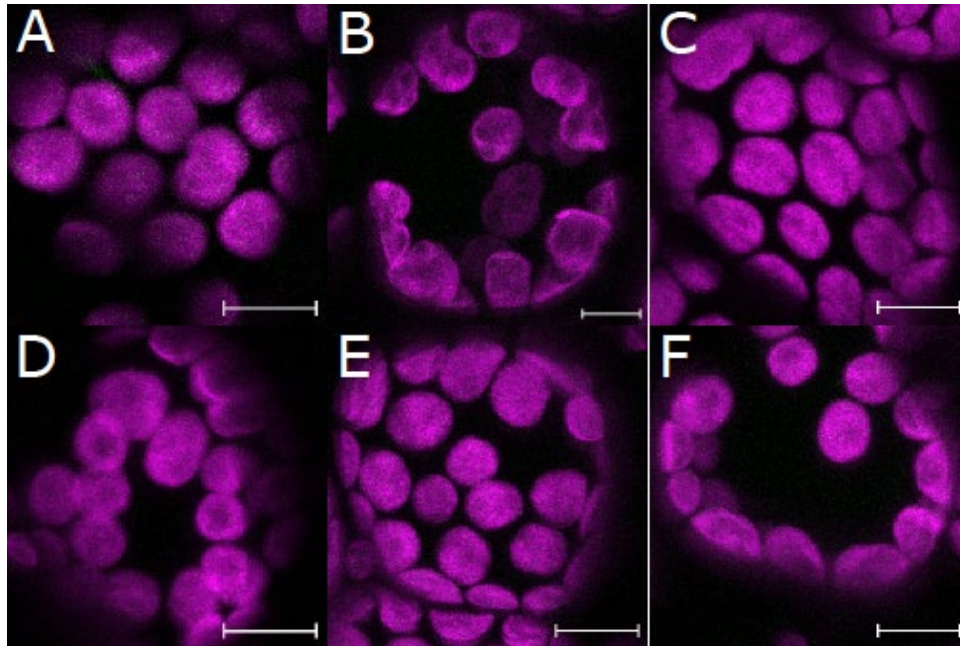

**Supplementary Figure S6. Negative results from OZ2 BiFC performed in *N. benthamiana* using transient nYFP/cYFP fusion protein expression constructs.** Green = YFP fluorescence; magenta = chlorophyll autofluorescence; scale bars = 10  $\mu\text{m}$ . (A) MISF74 + OZ2. (B) mTERF15 + OZ2. (C) OTP439 + OZ2. (D) RUG3 + OZ2. (E) SLO3 + OZ2. (F) WTF9 + OZ2.
